# Supplementary material for: Assessment of Anti-Alzheimer Pursuit of Jambolan Fruit Extract and/or Choline against AlCl3 Toxicity in Rats
Source: MDPI journal article supplement (doi:10.3390/toxics11060509), 2023-06-06
Supplement: s1 [file s1]

Z. abdel salam  
65mg/1.5ml

=====  
Injection Date : 8/29/2022 7:29:33 PM  
Sample Name : jambozia Location : Vial 51  
Acq. Operator : 12  
Acq. Instrument : Instrument 1 Inj Volume : 25 µl  
Method : C:\HPCHEM\1\METHODS\PHENOLS2.M  
Last changed : 8/29/2022 7:28:07 PM by 12  
(modified after loading)

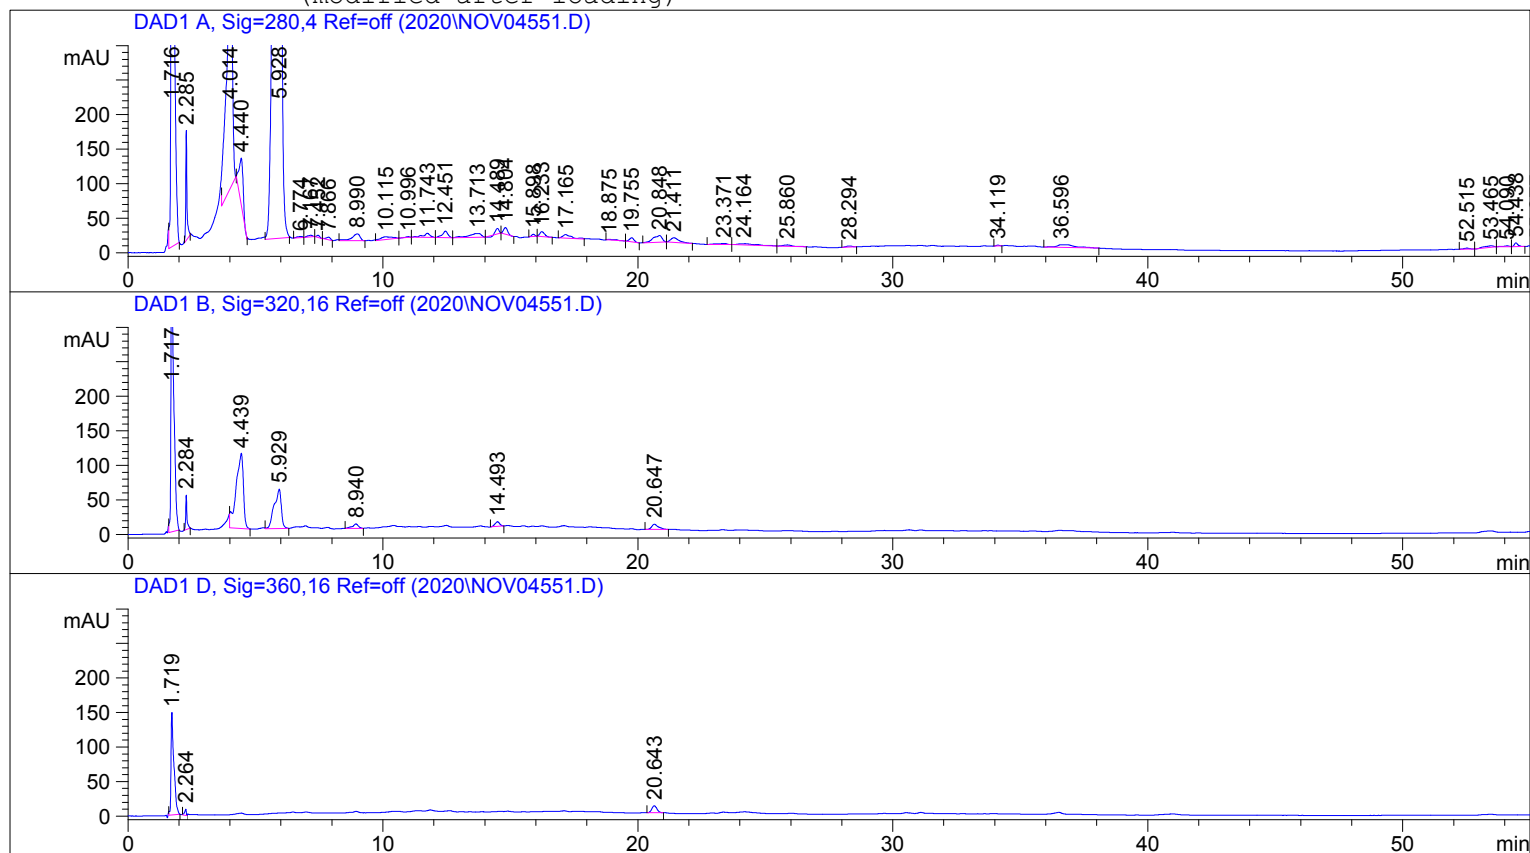

=====  
Area Percent Report  
=====

Sorted By : Signal  
Multiplier : 1.0000  
Dilution : 1.0000  
Use Multiplier & Dilution Factor with ISTDs

Signal 1: DAD1 A, Sig=280,4 Ref=off

| Peak # | RetTime [min] | Type | Width [min] | Area [mAU*s] | Height [mAU] | Area %  |
|--------|---------------|------|-------------|--------------|--------------|---------|
| 1      | 1.716         | BBA  | 0.1003      | 6861.94336   | 927.29596    | 12.0603 |
| 2      | 2.285         | PBA  | 0.0519      | 543.70203    | 158.99638    | 0.9556  |
| 3      | 4.014         | BB   | 0.2109      | 5484.32959   | 365.78336    | 9.6390  |
| 4      | 4.440         | VBA  | 0.1603      | 717.07520    | 67.31033     | 1.2603  |
| 5      | 5.928         | PBA  | 0.2672      | 2.02850e4    | 1060.14404   | 35.6520 |
| 6      | 6.774         | PB   | 0.1932      | 24.20934     | 1.79629      | 0.0425  |
| 7      | 7.167         | VB   | 0.2080      | 34.79990     | 2.41613      | 0.0612  |
| 8      | 7.452         | VBA  | 0.1294      | 25.45391     | 3.17896      | 0.0447  |
| 9      | 7.866         | BBA  | 0.1733      | 42.61522     | 3.72965      | 0.0749  |
| 10     | 8.990         | BBA  | 0.3483      | 224.67941    | 9.76897      | 0.3949  |
| 11     | 10.115        | PB   | 0.4607      | 131.08319    | 4.01711      | 0.2304  |
| 12     | 10.996        | VB   | 0.1881      | 17.02694     | 1.27228      | 0.0299  |
| 13     | 11.743        | VB   | 0.2675      | 119.20752    | 6.11307      | 0.2095  |
| 14     | 12.451        | VB   | 0.2277      | 144.74051    | 9.39816      | 0.2544  |
| 15     | 13.713        | VB   | 0.5075      | 189.65312    | 5.37689      | 0.3333  |
| 16     | 14.489        | VB   | 0.1405      | 60.52457     | 7.98264      | 0.1064  |
| 17     | 14.804        | VBA  | 0.1826      | 107.00478    | 9.55721      | 0.1881  |

| Peak<br># | RetTime<br>[min] | Type | Width<br>[min] | Area<br>[mAU*s] | Height<br>[mAU] | Area<br>% |
|-----------|------------------|------|----------------|-----------------|-----------------|-----------|
| ----      | -----            | ---- | -----          | -----           | -----           | -----     |
| 18        | 15.898           | PB   | 0.1433         | 27.47092        | 3.10374         | 0.0483    |
| 19        | 16.233           | VBA  | 0.2024         | 89.89925        | 6.97476         | 0.1580    |
| 20        | 17.165           | PBA  | 0.3144         | 121.80498       | 5.25579         | 0.2141    |
| 21        | 18.875           | PB   | 0.3451         | 29.39196        | 1.15413         | 0.0517    |
| 22        | 19.755           | VBA  | 0.1918         | 72.97198        | 5.92058         | 0.1283    |
| 23        | 20.848           | PB   | 0.3338         | 233.85417       | 9.54711         | 0.4110    |
| 24        | 21.411           | VBA  | 0.3365         | 150.23920       | 6.62641         | 0.2641    |
| 25        | 23.371           | PB   | 0.3663         | 45.62923        | 1.71567         | 0.0802    |
| 26        | 24.164           | VB   | 0.7309         | 90.77269        | 1.85507         | 0.1595    |
| 27        | 25.860           | VBA  | 0.3745         | 48.88525        | 1.93646         | 0.0859    |
| 28        | 28.294           | PBA  | 0.2588         | 28.81634        | 1.72556         | 0.0506    |
| 29        | 34.119           | PBA  | 0.1451         | 11.49971        | 1.27670         | 0.0202    |
| 30        | 36.596           | PBA  | 0.6554         | 201.61954       | 3.82211         | 0.3544    |
| 31        | 52.515           | PB   | 0.2395         | 23.39412        | 1.48762         | 0.0411    |
| 32        | 53.465           | VB   | 0.4130         | 68.64340        | 2.34825         | 0.1206    |
| 33        | 54.090           | VB   | 0.2734         | 22.66804        | 1.21640         | 0.0398    |
| 34        | 54.438           | VBA  | 0.1578         | 53.92165        | 5.34110         | 0.0948    |
| 35        | 55.277           | BBA  | 0.1884         | 22.79411        | 1.79252         | 0.0401    |
| 36        | 56.336           | BB   | 0.2280         | 20.38576        | 1.21368         | 0.0358    |
| 37        | 56.832           | VBA  | 0.1449         | 12.15642        | 1.30203         | 0.0214    |
| 38        | 58.717           | PBA  | 0.0597         | 41.73817        | 11.15557        | 0.0734    |
| 39        | 59.320           | PBA  | 0.0935         | 2340.53638      | 361.77420       | 4.1136    |
| 40        | 59.791           | PBA  | 0.1444         | 1.79128e4       | 1928.31763      | 31.4828   |
| 41        | 60.773           | BB   | 0.2238         | 44.52031        | 3.09468         | 0.0782    |
| 42        | 62.047           | VBA  | 0.1792         | 167.65778       | 13.66077        | 0.2947    |

Totals : 5.68971e4 5027.75599

Results obtained with enhanced integrator!

Signal 2: DAD1 B, Sig=320,16 Ref=off

| Peak<br># | RetTime<br>[min] | Type | Width<br>[min] | Area<br>[mAU*s] | Height<br>[mAU] | Area<br>% |
|-----------|------------------|------|----------------|-----------------|-----------------|-----------|
| ----      | -----            | ---- | -----          | -----           | -----           | -----     |
| 1         | 1.717            | BBA  | 0.0983         | 3065.87061      | 424.28552       | 34.0193   |
| 2         | 2.284            | PBA  | 0.0542         | 179.58778       | 49.67238        | 1.9927    |
| 3         | 4.439            | BBA  | 0.2734         | 2169.90576      | 108.45674       | 24.0776   |
| 4         | 5.929            | BBA  | 0.2663         | 1104.71802      | 56.95844        | 12.2581   |
| 5         | 8.940            | BBA  | 0.2345         | 107.58514       | 6.59008         | 1.1938    |
| 6         | 14.493           | PBA  | 0.2046         | 86.60702        | 6.61957         | 0.9610    |
| 7         | 20.647           | BBA  | 0.2693         | 142.33298       | 7.64121         | 1.5793    |
| 8         | 59.114           | PB   | 0.0746         | 30.65472        | 6.31337         | 0.3401    |
| 9         | 59.322           | VBA  | 0.1036         | 1933.99695      | 269.88635       | 21.4599   |
| 10        | 60.155           | PB   | 0.0712         | 41.22239        | 9.38686         | 0.4574    |
| 11        | 60.340           | VB   | 0.0751         | 67.48535        | 14.29713        | 0.7488    |
| 12        | 60.505           | VBA  | 0.0704         | 61.38551        | 14.20889        | 0.6811    |
| 13        | 62.077           | BB   | 0.0685         | 20.80050        | 5.00212         | 0.2308    |

Totals : 9012.15271 979.31866

Results obtained with enhanced integrator!

Signal 3: DAD1 D, Sig=360,16 Ref=off

| Peak<br># | RetTime<br>[min] | Type | Width<br>[min] | Area<br>[mAU*s] | Height<br>[mAU] | Area<br>% |
|-----------|------------------|------|----------------|-----------------|-----------------|-----------|
| ----      | -----            | ---- | -----          | -----           | -----           | -----     |
| 1         | 1.719            | BBA  | 0.1066         | 1153.15784      | 148.48129       | 61.0249   |
| 2         | 2.264            | BBA  | 0.0611         | 37.54815        | 8.93021         | 1.9870    |
| 3         | 20.643           | PBA  | 0.2188         | 141.80185       | 10.15965        | 7.5041    |
| 4         | 59.322           | PBA  | 0.0971         | 513.14935       | 77.61026        | 27.1558   |
| 5         | 60.503           | BBA  | 0.1132         | 43.99489        | 5.50652         | 2.3282    |

Totals : 1889.65208 250.68792

Results obtained with enhanced integrator!

\*\*\* End of Report \*\*\*

phenol

```

=====
Injection Date   : 8/29/2022 6:05:59 PM
Sample Name     : std                               Location : Vial 1
Acq. Operator   : 12
Acq. Instrument : Instrument 1                     Inj Volume : 10 µl
Acq. Method     : C:\HPCHEM\1\METHODS\PHENOLS2.M
Last changed    : 8/29/2022 6:04:50 PM by 12
                  (modified after loading)
Analysis Method : C:\HPCHEM\1\METHODS\PHENOLS2.M
Last changed    : 8/29/2022 8:54:13 PM by 12
                  (modified after loading)
=====

```

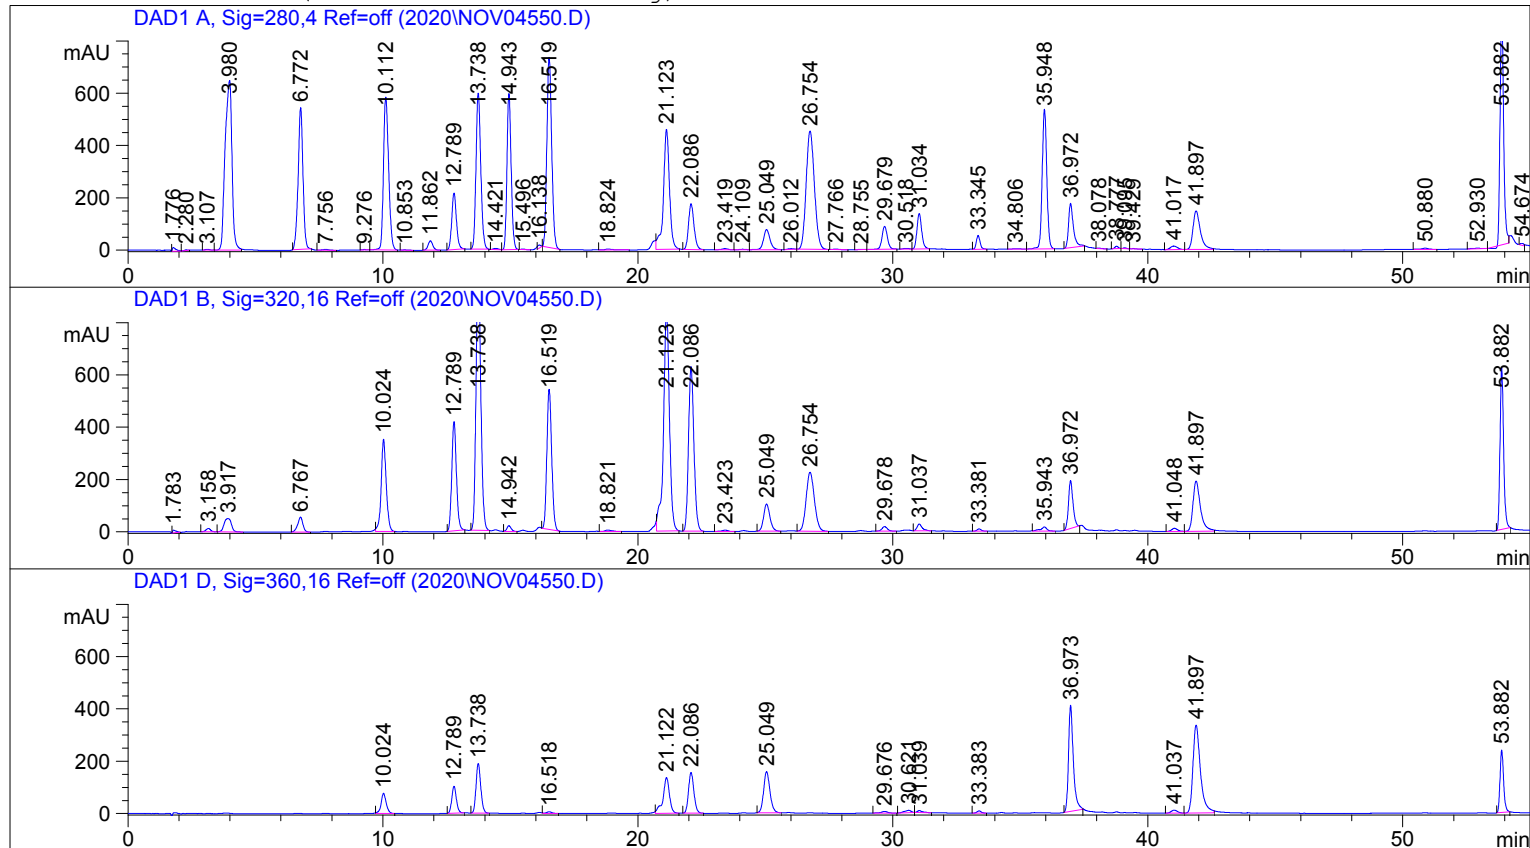

=====  
Area Percent Report  
=====

```

Sorted By      : Signal
Multiplier     : 1.0000
Dilution      : 1.0000
Use Multiplier & Dilution Factor with ISTDs

```

Signal 1: DAD1 A, Sig=280,4 Ref=off

| Peak # | RetTime [min] | Type | Width [min] | Area [mAU*s] | Height [mAU] | Area % |
|--------|---------------|------|-------------|--------------|--------------|--------|
| 1      | 1.776         | PB   | 0.1304      | 145.20306    | 15.34984     | 0.1178 |
| 2      | 2.280         | VBA  | 0.1206      | 20.81437     | 2.51428      | 0.0169 |
| 3      | 3.107         | PB   | 0.1853      | 29.30627     | 2.56464      | 0.0238 |
| 4      | 3.980         | PBA  | 0.3083      | 1.20159e4    | 648.09680    | 9.7471 |
| 5      | 6.772         | BBA  | 0.2021      | 7147.78516   | 541.00671    | 5.7982 |
| 6      | 7.756         | BBA  | 0.2485      | 47.41416     | 2.93516      | 0.0385 |
| 7      | 9.276         | PB   | 0.1950      | 15.52910     | 1.30332      | 0.0126 |
| 8      | 10.112        | VBA  | 0.2162      | 8207.52930   | 583.12683    | 6.6578 |
| 9      | 10.853        | PBA  | 0.2039      | 15.58479     | 1.26380      | 0.0126 |
| 10     | 11.862        | BBA  | 0.2016      | 464.19873    | 36.20041     | 0.3765 |
| 11     | 12.789        | PBA  | 0.1963      | 2748.69336   | 216.16930    | 2.2297 |
| 12     | 13.738        | BBA  | 0.2036      | 7736.05859   | 595.31335    | 6.2754 |
| 13     | 14.421        | BB   | 0.1879      | 52.50232     | 4.37975      | 0.0426 |
| 14     | 14.943        | VBA  | 0.1769      | 6788.07373   | 595.89319    | 5.5064 |
| 15     | 15.496        | PBA  | 0.1553      | 23.23472     | 2.35045      | 0.0188 |

| Peak # | RetTime [min] | Type | Width [min] | Area [mAU*s] | Height [mAU] | Area %   |
|--------|---------------|------|-------------|--------------|--------------|----------|
| 16     | 16.138        | PB   | 0.1464      | 96.99231     | 11.49631     | 0.0787   |
| 17     | 16.519        | VBA  | 0.2059      | 9586.00781   | 726.70435    | 7.7760   |
| 18     | 18.824        | BBA  | 0.2975      | 68.96020     | 3.33174      | 0.0559   |
| 19     | 21.123        | BBA  | 0.2497      | 7596.95361   | 457.57028    | 6.1625   |
| 20     | 22.086        | BBA  | 0.2308      | 2612.27051   | 174.38321    | 2.1190   |
| 21     | 23.419        | PB   | 0.2597      | 77.00349     | 4.58946      | 0.0625   |
| 22     | 24.109        | VB   | 0.2568      | 27.50188     | 1.81492      | 0.0223   |
| 23     | 25.049        | VBA  | 0.2704      | 1355.31458   | 76.60731     | 1.0994   |
| 24     | 26.012        | PB   | 0.2495      | 46.66495     | 3.06668      | 0.0379   |
| 25     | 26.754        | VBA  | 0.3509      | 1.01797e4    | 451.75534    | 8.2576   |
| 26     | 27.766        | BBA  | 0.2494      | 38.27962     | 2.30903      | 0.0311   |
| 27     | 28.755        | PB   | 0.2243      | 20.36964     | 1.41218      | 0.0165   |
| 28     | 29.679        | VBA  | 0.2296      | 1308.08447   | 87.90252     | 1.0611   |
| 29     | 30.518        | PB   | 0.2977      | 42.49326     | 2.45740      | 0.0345   |
| 30     | 31.034        | VBA  | 0.2000      | 1757.38672   | 134.92480    | 1.4256   |
| 31     | 33.345        | BBA  | 0.1544      | 532.08350    | 52.44175     | 0.4316   |
| 32     | 34.806        | PB   | 0.2605      | 26.67685     | 1.49287      | 0.0216   |
| 33     | 35.948        | VBA  | 0.1947      | 6711.89941   | 533.85681    | 5.4446   |
| 34     | 36.972        | PBA  | 0.1977      | 2234.01904   | 169.56470    | 1.8122   |
| 35     | 38.078        | BBA  | 0.1859      | 19.05911     | 1.44445      | 0.0155   |
| 36     | 38.777        | PB   | 0.1531      | 91.47002     | 9.43530      | 0.0742   |
| 37     | 39.095        | VB   | 0.1546      | 29.88517     | 3.15110      | 0.0242   |
| 38     | 39.429        | VBA  | 0.1830      | 16.62256     | 1.35598      | 0.0135   |
| 39     | 41.017        | PB   | 0.3063      | 256.63104    | 13.46881     | 0.2082   |
| 40     | 41.897        | VBA  | 0.3083      | 2988.93872   | 147.59384    | 2.4246   |
| 41     | 50.880        | BBA  | 0.2843      | 92.62884     | 4.73457      | 0.0751   |
| 42     | 52.930        | PB   | 0.3570      | 63.46002     | 2.39623      | 0.0515   |
| 43     | 53.882        | VBA  | 0.1527      | 8556.11719   | 885.80542    | 6.9406   |
| 44     | 54.674        | BBA  | 0.1361      | 67.69601     | 7.58861      | 0.0549   |
| 45     | 55.423        | VB   | 0.1070      | 8.41187      | 1.38140      | 6.824e-3 |
| 46     | 56.848        | VBA  | 0.5464      | 87.56845     | 2.01730      | 0.0710   |
| 47     | 58.212        | PB   | 0.1444      | 160.16315    | 17.89057     | 0.1299   |
| 48     | 58.688        | PBA  | 0.0607      | 49.88667     | 13.01328     | 0.0405   |
| 49     | 59.283        | PBA  | 0.0923      | 2793.92017   | 451.10129    | 2.2664   |
| 50     | 59.745        | PBA  | 0.1488      | 1.77179e4    | 1832.54846   | 14.3724  |
| 51     | 61.300        | VBA  | 0.4833      | 336.35559    | 8.46968      | 0.2728   |
| 52     | 61.927        | PBA  | 0.1439      | 163.64844    | 17.37870     | 0.1327   |

Totals : 1.23277e5 9566.92447

Results obtained with enhanced integrator!

Signal 2: DAD1 B, Sig=320,16 Ref=off

| Peak # | RetTime [min] | Type | Width [min] | Area [mAU*s] | Height [mAU] | Area %  |
|--------|---------------|------|-------------|--------------|--------------|---------|
| 1      | 1.783         | PBA  | 0.1257      | 99.52183     | 10.77702     | 0.1266  |
| 2      | 3.158         | BBA  | 0.1907      | 157.13232    | 12.84486     | 0.1999  |
| 3      | 3.917         | VBA  | 0.3262      | 998.45508    | 50.59586     | 1.2702  |
| 4      | 6.767         | BBA  | 0.2150      | 810.00751    | 56.57182     | 1.0305  |
| 5      | 10.024        | BBA  | 0.2046      | 4854.06299   | 352.60684    | 6.1751  |
| 6      | 12.789        | PBA  | 0.1958      | 5283.75146   | 416.98819    | 6.7218  |
| 7      | 13.738        | BBA  | 0.1995      | 1.31632e4    | 1013.37085   | 16.7457 |
| 8      | 14.942        | PBA  | 0.1750      | 243.54747    | 21.68786     | 0.3098  |
| 9      | 16.519        | PBA  | 0.2058      | 7057.86572   | 535.47009    | 8.9787  |
| 10     | 18.821        | BBA  | 0.2646      | 106.03281    | 5.81958      | 0.1349  |
| 11     | 21.123        | BBA  | 0.2457      | 1.36823e4    | 841.41803    | 17.4061 |
| 12     | 22.086        | BBA  | 0.2279      | 9254.64746   | 628.14276    | 11.7734 |
| 13     | 23.423        | BBA  | 0.2471      | 89.39497     | 5.45681      | 0.1137  |
| 14     | 25.049        | PBA  | 0.2697      | 1793.90637   | 103.75544    | 2.2821  |
| 15     | 26.754        | BBA  | 0.3508      | 5062.41064   | 224.75359    | 6.4402  |
| 16     | 29.678        | BBA  | 0.2320      | 263.94879    | 17.49628     | 0.3358  |
| 17     | 31.037        | PBA  | 0.2147      | 365.80841    | 25.59489     | 0.4654  |
| 18     | 33.381        | BBA  | 0.1800      | 101.13263    | 8.67873      | 0.1287  |
| 19     | 35.943        | BBA  | 0.2546      | 282.29605    | 15.94406     | 0.3591  |
| 20     | 36.972        | PBA  | 0.1881      | 2263.90015   | 183.24100    | 2.8800  |
| 21     | 41.048        | PB   | 0.2423      | 182.36859    | 11.66902     | 0.2320  |
| 22     | 41.897        | VBA  | 0.3086      | 3883.83545   | 191.48112    | 4.9409  |
| 23     | 53.882        | PBA  | 0.1492      | 6008.62988   | 619.07715    | 7.6439  |
| 24     | 59.075        | PB   | 0.0703      | 38.71469     | 8.62852      | 0.0493  |
| 25     | 59.283        | VBA  | 0.0965      | 2199.76562   | 335.60617    | 2.7985  |

| Peak # | RetTime [min] | Type | Width [min] | Area [mAU*s] | Height [mAU] | Area % |
|--------|---------------|------|-------------|--------------|--------------|--------|
| 26     | 60.451        | PBA  | 0.0732      | 35.92463     | 7.87847      | 0.0457 |
| 27     | 62.404        | BBA  | 0.3831      | 323.88855    | 10.40805     | 0.4120 |

Totals : 7.86064e4 5715.96306

Results obtained with enhanced integrator!

Signal 3: DAD1 D, Sig=360,16 Ref=off

| Peak # | RetTime [min] | Type | Width [min] | Area [mAU*s] | Height [mAU] | Area %  |
|--------|---------------|------|-------------|--------------|--------------|---------|
| 1      | 10.024        | BBA  | 0.2061      | 1079.79700   | 77.71843     | 3.7936  |
| 2      | 12.789        | PBA  | 0.1946      | 1287.66370   | 102.50054    | 4.5238  |
| 3      | 13.738        | PBA  | 0.1993      | 2449.56958   | 188.85277    | 8.6059  |
| 4      | 16.518        | BBA  | 0.2295      | 96.30482     | 6.32858      | 0.3383  |
| 5      | 21.122        | BBA  | 0.2606      | 2398.13721   | 136.75647    | 8.4252  |
| 6      | 22.086        | PBA  | 0.2274      | 2296.56396   | 156.30453    | 8.0683  |
| 7      | 25.049        | BBA  | 0.2664      | 2734.06470   | 157.62489    | 9.6054  |
| 8      | 29.676        | BBA  | 0.2785      | 122.99583    | 6.56717      | 0.4321  |
| 9      | 30.621        | PB   | 0.2700      | 162.29652    | 8.84777      | 0.5702  |
| 10     | 31.039        | VBA  | 0.2210      | 110.37918    | 7.44563      | 0.3878  |
| 11     | 33.383        | BBA  | 0.1776      | 96.01796     | 8.38738      | 0.3373  |
| 12     | 36.973        | PBA  | 0.1974      | 5315.88428   | 404.26114    | 18.6759 |
| 13     | 41.037        | PB   | 0.2732      | 194.96971    | 11.30743     | 0.6850  |
| 14     | 41.897        | VBA  | 0.3058      | 6851.20752   | 336.07614    | 24.0698 |
| 15     | 53.882        | PBA  | 0.1491      | 2310.08667   | 238.35675    | 8.1158  |
| 16     | 59.283        | PBA  | 0.0918      | 595.98303    | 96.86105     | 2.0938  |
| 17     | 62.478        | BBA  | 0.4865      | 361.98962    | 10.39005     | 1.2717  |

Totals : 2.84639e4 1954.58672

Results obtained with enhanced integrator!

\*\*\* End of Report \*\*\*

Table 1S. Primers for gene expression by RT-PCR

| Gene           | Direction | Primer sequence      | Accession number |
|----------------|-----------|----------------------|------------------|
| iKB- $\alpha$  | F:        | CGGGAGAATGACGTGAAGGT | NM_053355        |
|                | R:        | AGCAGCAGCCGTACCATATC |                  |
| NF- $\kappa$ B | F:        | TTCAACATGGCAGACGACGA | NM_001415012     |
|                | R:        | GGTATGGGCCATCTGCTGTT |                  |
| iNOS           | F:        | TGGGTGAAAGCGGTGTTCTT | S71597           |
|                | R:        | TAGCGTTCCGACTTCCTTG  |                  |
| GAPDH          | F:        | TGGGTGAAAGCGGTGTTCTT | NM_017008        |
|                | R:        | TAGCGTTCCGACTTCCTTG  |                  |

iKB-  $\alpha$ , inhibitor of nuclear factor kappa B kinase ,

iNOS, Inducible nitric oxide synthase

NF- $\kappa$ B. nuclear factor kappa b.

GAPDH, glyceraldehyde-3-phosphate dehydrogenase. SOD, superoxide dismutase.
